# Supplementary material for: Decoding the Ubiquitin-Mediated Pathway of Arthropod Disease Vectors
Source: PubMed Central journal article supplement (PMC3804464; doi:10.1371/journal.pone.0078077), 2013-10-21
Supplement: pone.0078077.s001.pdf [file pone.0078077.s001.pdf]

**Table S1.** Source and release date of proteome dataset

| <b>Organism</b>                 | <b>Source</b>                                                                                                                                                                                                                                                                                                 | <b>Version [Release Date]</b> |
|---------------------------------|---------------------------------------------------------------------------------------------------------------------------------------------------------------------------------------------------------------------------------------------------------------------------------------------------------------|-------------------------------|
| <i>Anopheles gambiae</i>        | <a href="http://agambiae.vectorbase.org/downloads/public_data/organism_data/agambiae/Geneset/agambiae.PEPTIDES-AgamP3.6.fa.gz">http://agambiae.vectorbase.org/downloads/public_data/organism_data/agambiae/Geneset/agambiae.PEPTIDES-AgamP3.6.fa.gz</a>                                                       | 3.6 [DEC 2010]                |
| <i>Aedes aegypti</i>            | <a href="http://aaegypti.vectorbase.org/downloads/public_data/organism_data/aaegypti/Geneset/aaegypti.PEPTIDES-AaegL1.3.fa.gz">http://aaegypti.vectorbase.org/downloads/public_data/organism_data/aaegypti/Geneset/aaegypti.PEPTIDES-AaegL1.3.fa.gz</a>                                                       | 1.3 [MAR 2012]                |
| <i>Culex quinquefasciatus</i>   | <a href="http://cquinquefasciatus.vectorbase.org/downloads/public_data/organism_data/cquinquefasciatus/Geneset/cquinquefasciatus.PEPTIDES-CpipJ1.3.fa.gz">http://cquinquefasciatus.vectorbase.org/downloads/public_data/organism_data/cquinquefasciatus/Geneset/cquinquefasciatus.PEPTIDES-CpipJ1.3.fa.gz</a> | 1.3 [JAN 2012]                |
| <i>Ixodes scapularis</i>        | <a href="http://iscapularis.vectorbase.org/downloads/public_data/organism_data/iscapularis/Geneset/iscapularis.PEPTIDES-IscaW1.2.fa.gz">http://iscapularis.vectorbase.org/downloads/public_data/organism_data/iscapularis/Geneset/iscapularis.PEPTIDES-IscaW1.2.fa.gz</a>                                     | 1.2 [MAR 2012]                |
| <i>Pediculus humanus</i>        | <a href="http://phumanus.vectorbase.org/downloads/public_data/organism_data/phumanus/Geneset/phumanus.PEPTIDES-PhumU1.2.fa.gz">http://phumanus.vectorbase.org/downloads/public_data/organism_data/phumanus/Geneset/phumanus.PEPTIDES-PhumU1.2.fa.gz</a>                                                       | 1.2 [FEB 2010]                |
| <i>Rhodnius prolixus</i>        | <a href="http://rprolixus.vectorbase.org/downloads/public_data/organism_data/rprolixus/Geneset/rprolixus.PEPTIDES-RproC1.fa.gz">http://rprolixus.vectorbase.org/downloads/public_data/organism_data/rprolixus/Geneset/rprolixus.PEPTIDES-RproC1.fa.gz</a>                                                     | 1.0 [JUN 2010]                |
| <i>Saccharomyces cerevisiae</i> | <a href="ftp://genome-ftp.stanford.edu/pub/yeast/data_download/sequence/genomic_sequence/orf_protein/orf_trans_all.fasta.gz">ftp://genome-ftp.stanford.edu/pub/yeast/data_download/sequence/genomic_sequence/orf_protein/orf_trans_all.fasta.gz</a>                                                           | N/A [FEB 2012]                |
| <i>Drosophila melanogaster</i>  | <a href="ftp://ftp.flybase.net/genomes/Drosophila_melanogaster/dmel_r5.48_FB2012_06/fasta/dmel-all-translation-r5.48.fasta.gz">ftp://ftp.flybase.net/genomes/Drosophila_melanogaster/dmel_r5.48_FB2012_06/fasta/dmel-all-translation-r5.48.fasta.gz</a>                                                       | 5.48 [OCT 2012]               |
| <i>Mus musculus</i>             | <a href="ftp://ftp.ncbi.nlm.nih.gov/genomes/M_musculus/protein/protein.fa.gz">ftp://ftp.ncbi.nlm.nih.gov/genomes/M_musculus/protein/protein.fa.gz</a>                                                                                                                                                         | N/A [OCT 2012]                |
| <i>Homo sapiens</i>             | <a href="ftp://ftp.ncbi.nlm.nih.gov/genomes/H_sapiens/protein/protein.fa.gz">ftp://ftp.ncbi.nlm.nih.gov/genomes/H_sapiens/protein/protein.fa.gz</a>                                                                                                                                                           | N/A [NOV 2012]                |
